# Supplementary material for: Dramatic Increases in Telehealth-Related Tweets during the Early COVID-19 Pandemic: A Sentiment Analysis
Source: MDPI journal article supplement (doi:10.3390/healthcare9060634), 2021-05-27
Supplement: s1 [file s1]

**Table S1: BERT-base****COVID**

|                 | Predicted positive | Predicted negative |
|-----------------|--------------------|--------------------|
| Actual positive | TP=84              | FN=17              |
| Actual negative | FP=8               | TN=279             |

**Telehealth**

|                 | Predicted positive | Predicted negative |
|-----------------|--------------------|--------------------|
| Actual positive | TP=391             | FN=1               |
| Actual negative | FP=6               | TN=2               |

**User**

|        |             | Predicted |        |           |          |             |
|--------|-------------|-----------|--------|-----------|----------|-------------|
|        |             | Unknown   | Vendor | Clinician | Consumer | Policymaker |
| Actual | Unknown     | 210       | 41     | 9         | 4        | 2           |
|        | Vendor      | 43        | 29     | 2         | 1        | 0           |
|        | Clinician   | 7         | 4      | 9         | 4        | 0           |
|        | Consumer    | 7         | 0      | 0         | 12       | 0           |
|        | Policymaker | 2         | 0      | 0         | 0        | 2           |

|         | Recall | Precision | F1     |
|---------|--------|-----------|--------|
| Unknown | 0.7895 | 0.7807    | 0.7850 |
| Vendor  | 0.3867 | 0.3919    | 0.3893 |

|                    |        |        |        |
|--------------------|--------|--------|--------|
| <b>Clinician</b>   | 0.3750 | 0.4500 | 0.4091 |
| <b>Consumer</b>    | 0.6316 | 0.5714 | 0.6000 |
| <b>Policymaker</b> | 0.5000 | 0.5000 | 0.5000 |

|                    | Train | Test | Total |
|--------------------|-------|------|-------|
| <b>Unknown</b>     | 1091  | 266  | 1357  |
| <b>Vendor</b>      | 279   | 75   | 354   |
| <b>Clinician</b>   | 93    | 24   | 117   |
| <b>Consumer</b>    | 71    | 19   | 90    |
| <b>Policymaker</b> | 19    | 4    | 23    |

### Sentiment

|               |          | <b>Predicted</b> |          |          |
|---------------|----------|------------------|----------|----------|
|               |          | <b>4</b>         | <b>3</b> | <b>2</b> |
| <b>Actual</b> | <b>4</b> | 178              | 39       | 4        |
|               | <b>3</b> | 65               | 77       | 2        |
|               | <b>2</b> | 9                | 6        | 8        |

|          | Recall | Precision | F1     |
|----------|--------|-----------|--------|
| <b>4</b> | 0.8054 | 0.7063    | 0.7526 |
| <b>3</b> | 0.5347 | 0.6311    | 0.5789 |
| <b>2</b> | 0.3478 | 0.5714    | 0.4324 |

|          | Train | Test | Total |
|----------|-------|------|-------|
| <b>4</b> | 886   | 221  | 1107  |
| <b>3</b> | 577   | 144  | 721   |
| <b>2</b> | 90    | 23   | 113   |

**Table S2: BERT-telehealth****COVID**

|                 | Predicted positive | Predicted negative |
|-----------------|--------------------|--------------------|
| Actual positive | TP=86              | FN=15              |
| Actual negative | FP=5               | TN=282             |

**Telehealth**

|                 | Predicted positive | Predicted negative |
|-----------------|--------------------|--------------------|
| Actual positive | TP=390             | FN=2               |
| Actual negative | FP=4               | TN=4               |

**User**

|        |             | Predicted |        |           |          |             |
|--------|-------------|-----------|--------|-----------|----------|-------------|
|        |             | Unknown   | Vendor | Clinician | Consumer | Policymaker |
| Actual | Unknown     | 212       | 41     | 8         | 3        | 2           |
|        | Vendor      | 38        | 33     | 3         | 1        | 0           |
|        | Clinician   | 10        | 3      | 10        | 1        | 0           |
|        | Consumer    | 8         | 0      | 0         | 11       | 0           |
|        | Policymaker | 2         | 0      | 0         | 0        | 2           |

|           | Recall | Precision | F1     |
|-----------|--------|-----------|--------|
| Unknown   | 0.7970 | 0.7852    | 0.7910 |
| Vendor    | 0.4400 | 0.4286    | 0.4342 |
| Clinician | 0.4167 | 0.4762    | 0.4444 |

|                    |        |        |        |
|--------------------|--------|--------|--------|
| <b>Consumer</b>    | 0.5789 | 0.6875 | 0.6286 |
| <b>Polycymaker</b> | 0.5000 | 0.5000 | 0.5000 |

**Sentiment**

|        |   | Predicted |    |    |
|--------|---|-----------|----|----|
|        |   | 4         | 3  | 2  |
| Actual | 4 | 185       | 31 | 5  |
|        | 3 | 67        | 77 | 0  |
|        | 2 | 8         | 4  | 11 |

|          | Recall | Precision | F1     |
|----------|--------|-----------|--------|
| <b>4</b> | 0.8371 | 0.7115    | 0.7692 |
| <b>3</b> | 0.5347 | 0.6875    | 0.6016 |
| <b>2</b> | 0.4783 | 0.6875    | 0.5641 |
